# Supplementary material for: The Role of Para-Aortic Lymphadenectomy in the Surgical Staging of Women with Intermediate and High-Risk Endometrial Adenocarcinomas
Source: Hindawi journal article supplement (doi:10.1155/2013/858916), 2013-01-01
Supplement: f1 [file 858916.f1.pdf]

Supplemental Table 1

**Supplemental Table 1a:** Variations of adjuvant therapy administration between the PPALN and the PLN group.

|                                       | PPALN<br>N=118 | PLN<br>N=139 | p-value |
|---------------------------------------|----------------|--------------|---------|
| Adjuvant therapy                      |                |              |         |
| None                                  | 21 (17.8%)     | 28 (20.1%)   | 0.02    |
| Vaginal brachytherapy alone           | 30 (25.4%)     | 16 (11.5%)   |         |
| Pelvic XRT* alone                     | 3 (2.5%)       | 3 (2.2%)     |         |
| Pelvic XRT and brachytherapy          | 8 (6.8%)       | 12 (8.6%)    |         |
| Chemotherapy alone                    | 18 (15.3%)     | 14 (10.1%)   |         |
| Chemotherapy + brachytherapy          | 14 (11.9%)     | 13 (9.4%)    |         |
| Chemotherapy + XRT                    | 3 (2.5%)       | 13 (9.4%)    |         |
| Chemotherapy + brachytherapy<br>+ XRT | 21 (17.8%)     | 40 (28.8%)   |         |

\* Radiation therapy

**Supplemental Table 1b:** Brachytherapy, pelvic radiation therapy or chemotherapy are not independent predictors of disease free survival.

|                                                  | No<br>recurrence<br>N=183 | Recurrence<br>N=74 | Age adjusted<br>HR (95% CI) | Fully<br>adjusted*<br>HR (95% CI) | p    |
|--------------------------------------------------|---------------------------|--------------------|-----------------------------|-----------------------------------|------|
| Adjuvant therapy                                 |                           |                    |                             |                                   |      |
| None                                             | 39<br>(21.3%)             | 10 (13.5%)         | 1.00                        | 1.00                              |      |
| Brachytherapy and/or<br>Pelvic radiation therapy | 59<br>(32.2%)             | 13 (17.6%)         | 0.82 (0.36,<br>1.90)        | 0.96 (0.40,<br>2.32)              | 0.93 |
| Chemotherapy                                     | 85<br>(46.4%)             | 51 (68.9%)         | 1.83 (0.92,<br>3.66)        | 1.73 (0.82,<br>3.69)              | 0.15 |

**Supplemental Table 1c:** Brachytherapy, pelvic radiation therapy or chemotherapy are not independent predictors of overall survival.

|                                   | Alive<br>N=244 | Dead<br>N=13 | Age adjusted<br>HR (95% CI) | Fully<br>adjusted*<br>HR (95% CI) | p    |
|-----------------------------------|----------------|--------------|-----------------------------|-----------------------------------|------|
| <b>Adjuvant therapy</b>           |                |              |                             |                                   |      |
| None                              | 47<br>(19.3%)  | 2 (15.4%)    | 1.00                        | 1.00                              |      |
| Brachytherapy and/or<br>radiation | 71<br>(29.1%)  | 1 (7.7%)     | 0.28 (0.02,<br>3.05)        | 0.74 (0.04,<br>13.4)              | 0.84 |
| Any chemotherapy                  | 126<br>(51.6%) | 10 (76.9%)   | 1.65 (0.36,<br>7.63)        | 1.66 (0.17,<br>15.8)              | 0.66 |
